# Supplementary material for: Genome-wide identification and characterization of NBS-encoding genes in Raphanus sativus L. and their roles related to Fusarium oxysporum resistance
Source: PubMed Central journal article supplement (PMC7814608; doi:10.1186/s12870-020-02803-8), 2021-01-18
Supplement: 12870_2020_2803_MOESM2_ESM.pdf [file 12870_2020_2803_MOESM2_ESM.pdf]

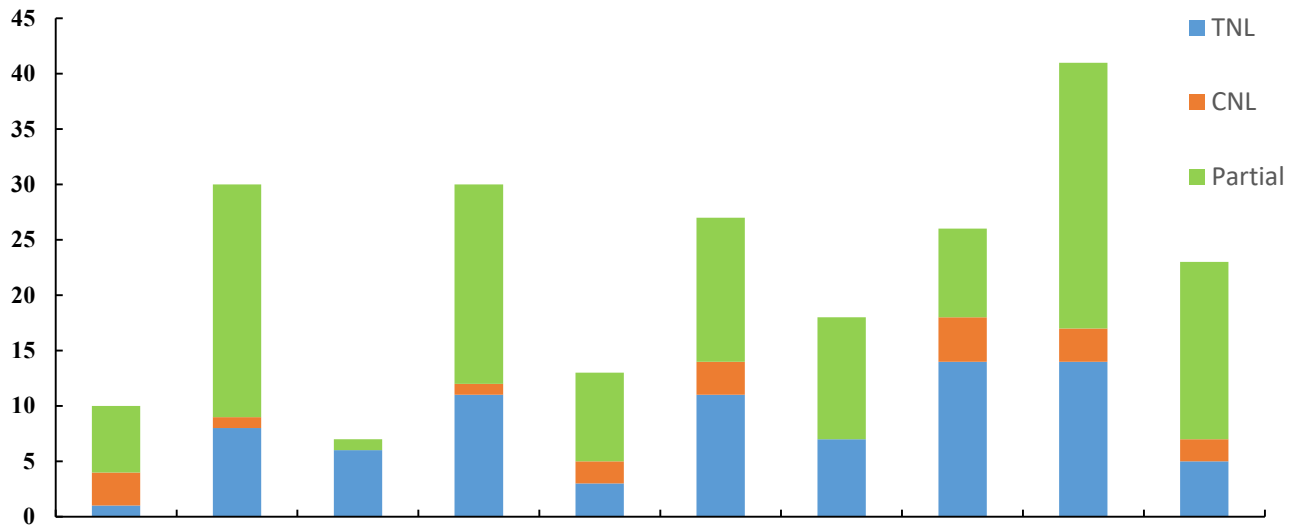

|         | R01 | R02 | R03 | R04 | R05 | R06 | R07 | R08 | R09 | RUS |
|---------|-----|-----|-----|-----|-----|-----|-----|-----|-----|-----|
| TNL     | 1   | 8   | 6   | 11  | 3   | 11  | 7   | 14  | 14  | 5   |
| CNL     | 3   | 1   | 0   | 1   | 2   | 3   | 0   | 4   | 3   | 2   |
| Partial | 6   | 21  | 1   | 18  | 8   | 13  | 11  | 8   | 24  | 16  |
