# Supplementary material for: Genome-wide identification and characterization of NBS-encoding genes in Raphanus sativus L. and their roles related to Fusarium oxysporum resistance
Source: PubMed Central journal article supplement (PMC7814608; doi:10.1186/s12870-020-02803-8), 2021-01-18

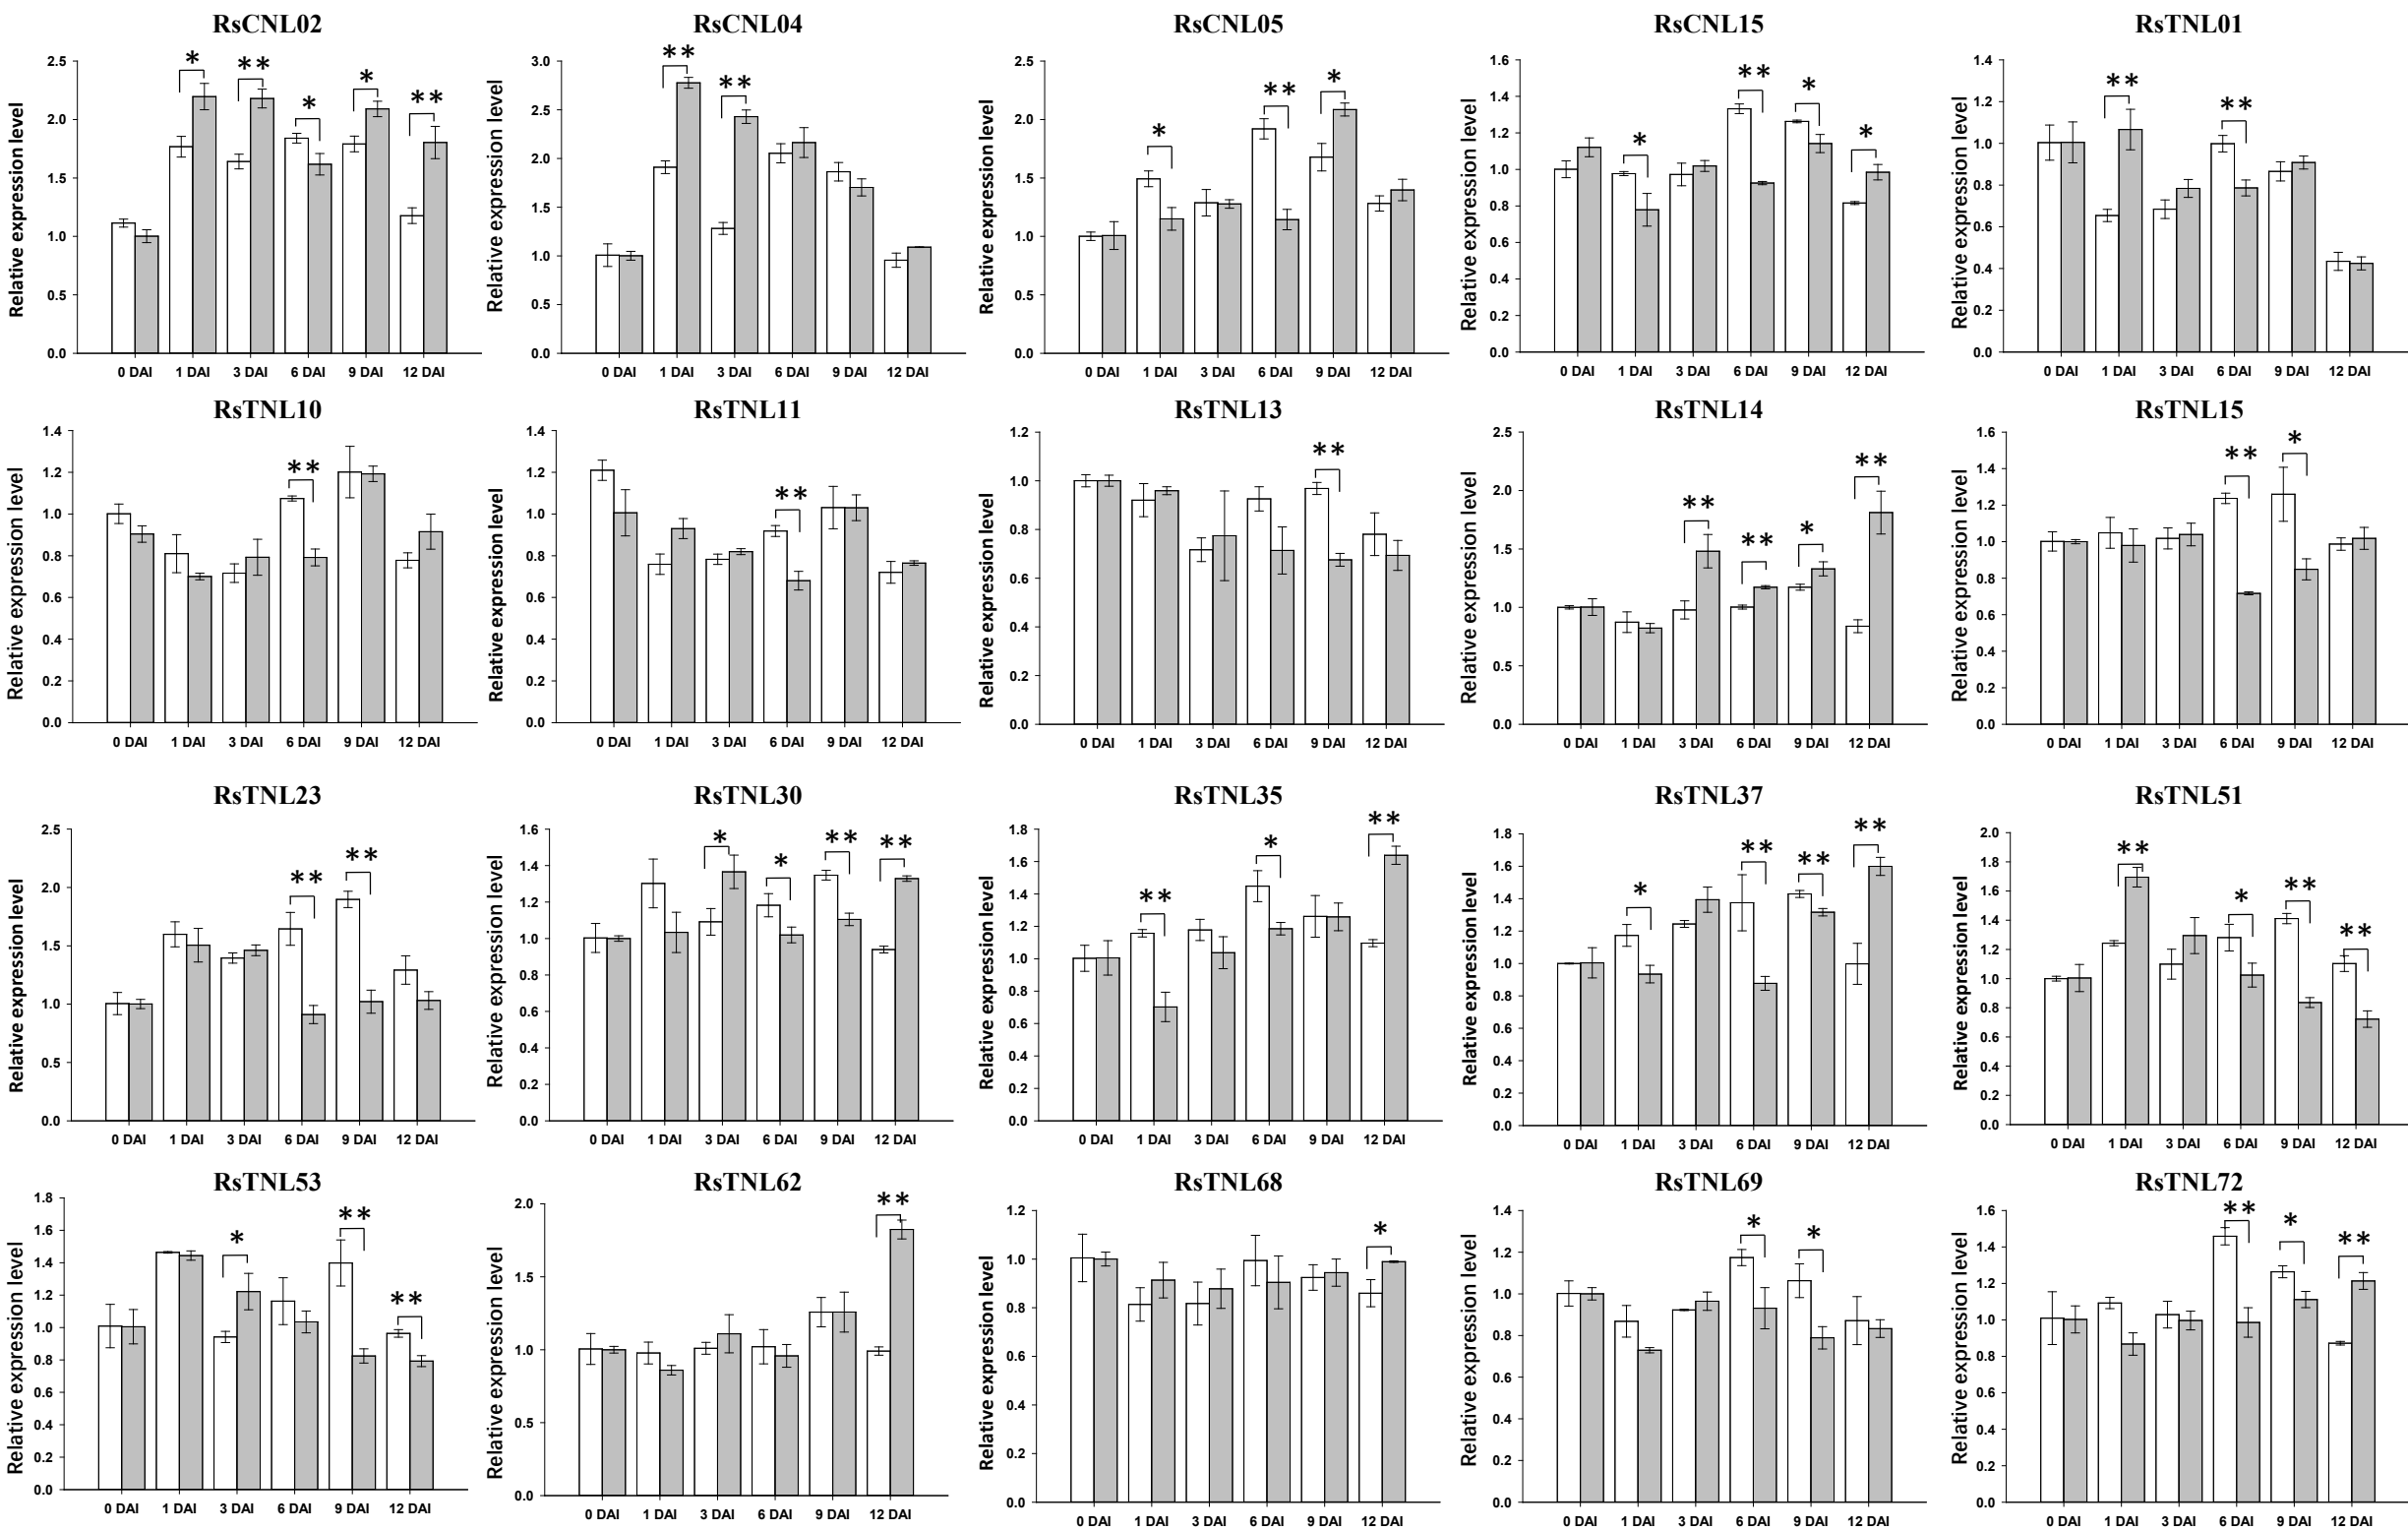

Supplement: 12870_2020_2803_MOESM4_ESM.pdf [file 12870_2020_2803_MOESM4_ESM.pdf]
